# Supplementary material for: Stem Cell Therapy for Diabetic Erectile Dysfunction in Rats: A Meta-Analysis
Source: PubMed Central journal article supplement (PMC4844188; doi:10.1371/journal.pone.0154341), 2016-04-25
Supplement: pone.0154341.s002.pdf [file pone.0154341.s002.pdf]

We searched the pre-clinical studies analyzing the efficacy of stem cell therapy for diabetic ED published before September 30, 2015 in PubMed, Web of Science and EBSCO. The following search strategy was used:  
(Erectile dysfunction) and (stem cell) and (diabetes) and (rat)
